# Supplementary material
Source: PubMed Central journal article supplement (PMC2753508)
Supplement: NIHMS134746-supplement-supplement_1.pdf [file NIHMS134746-supplement-supplement_1.pdf]

Supplemental Table 1.

| fiber family | k=1          | 1            | k=2          | 2            | k=3          | 3            |              | $\alpha_o$         | Error        |
|--------------|--------------|--------------|--------------|--------------|--------------|--------------|--------------|--------------------|--------------|
| c            | c1           | c2           | c1           | c2           | c1           | c2           |              | [Deg]              |              |
| [kPa]        | [kPa]        |              | [kPa]        |              | [kPa]        |              |              |                    |              |
| WT           |              |              |              |              |              |              |              |                    |              |
| 1            | 2.081        | 7.558        | 0.091        | 10.846       | 0.012        | 0.662        | 0.670        | 27.58              | 0.152        |
| 2            | 4.105        | 5.101        | 0.159        | 0.000        | 1.690        | 1.322        | 0.448        | 44.16              | 0.262        |
| 3            | 24.292       | 0.469        | 0.493        | 1.873        | 0.278        | 0.021        | 1.425        | 39.98              | 0.120        |
| 4            | 1.348        | 1.792        | 0.316        | 3.021        | 0.001        | 0.503        | 0.322        | 30.20              | 0.130        |
| 5            | 13.577       | 0.757        | 0.519        | 9.419        | 0.018        | 1.394        | 0.670        | 34.45              | 0.148        |
| 6            | 0.034        | 0.000        | 2.942        | 0.014        | 1.827        | 0.091        | 1.838        | 37.56              | 0.463        |
| 7            | 12.728       | 0.055        | 1.016        | 3.772        | 0.001        | 0.047        | 0.992        | 34.12              | 0.270        |
| avg          | <b>8.309</b> | <b>2.248</b> | <b>0.791</b> | <b>4.135</b> | <b>0.547</b> | <b>0.577</b> | <b>0.909</b> | <b>35.44</b>       | <b>0.221</b> |
| std          | 8.247        | 2.720        | 0.922        | 4.027        | 0.773        | 0.543        | 0.508        | 5.25               | 0.114        |
|              |              |              |              |              |              |              |              | $\alpha$ from NLOM |              |
| 2a           | 0.162        | 1.876        | 0.344        | 1.767        | 0.067        | 3.667        | 0.266        | <b>43.23</b>       | 0.223        |
| HET          |              |              |              |              |              |              |              |                    |              |
| 1            | 20.656       | 0.185        | 0.532        | 0.051        | 0.429        | 0.576        | 0.477        | 32.00              | 0.251        |
| 2            | 10.188       | 0.954        | 0.434        | 2.298        | 0.115        | 1.377        | 0.480        | 31.22              | 0.147        |
| 3            | 7.344        | 0.735        | 0.380        | 2.350        | 0.076        | 2.057        | 0.342        | 30.21              | 0.181        |
| 4            | 4.280        | 0.727        | 0.538        | 0.112        | 0.244        | 6.439        | 0.226        | 36.54              | 0.192        |
| 5            | 4.324        | 11.267       | 0.152        | 4.256        | 0.082        | 0.061        | 1.141        | 29.30              | 0.151        |
| 6            | 1.351        | 4.326        | 0.113        | 0.014        | 0.162        | 3.065        | 0.235        | 36.12              | 0.180        |
| avg          | <b>9.359</b> | <b>2.773</b> | <b>0.407</b> | <b>1.814</b> | <b>0.189</b> | <b>2.102</b> | <b>0.533</b> | <b>31.85</b>       | <b>0.184</b> |
| std          | 6.305        | 3.928        | 0.170        | 1.595        | 0.123        | 2.107        | 0.311        | 2.80               | 0.034        |
|              |              |              |              |              |              |              |              | $\alpha$ from NLOM |              |
| 5a           | 8.066        | 0.007        | 0.010        | 5.242        | 0.066        | 1.546        | 0.576        | <b>20.19</b>       | 0.249        |
| KO           |              |              |              |              |              |              |              |                    |              |
| 1            | 0.005        | 0.142        | 0.342        | 1.956        | 0.087        | 1.643        | 0.445        | 21.03              | 0.286        |
| 2            | 0.234        | 7.086        | 0.178        | 4.978        | 0.082        | 0.265        | 0.937        | 30.86              | 0.157        |
| 3            | 1.612        | 8.623        | 0.138        | 4.387        | 0.055        | 0.051        | 1.036        | 32.25              | 0.196        |
| 4            | 4.325        | 10.812       | 0.116        | 7.516        | 0.298        | 0.670        | 1.291        | 31.96              | 0.156        |
| 5            | 0.001        | 2.041        | 0.488        | 1.429        | 0.058        | 4.207        | 0.218        | 34.87              | 0.203        |
| 6            | 0.002        | 5.097        | 0.407        | 0.001        | 1.502        | 3.096        | 0.657        | 45.54              | 0.269        |
| 7            | 2.863        | 21.401       | 0.001        | 8.928        | 0.496        | 0.000        | 4.122        | 21.89              | 0.414        |
| 8            | 0.009        | 0.174        | 1.030        | 6.523        | 0.244        | 3.645        | 0.564        | 36.53              | 0.189        |
| 9            | 0.114        | 13.977       | 0.001        | 0.902        | 0.386        | 0.017        | 1.393        | 42.32              | 0.337        |
| avg          | <b>1.018</b> | <b>7.706</b> | <b>0.300</b> | <b>4.069</b> | <b>0.357</b> | <b>1.510</b> | <b>1.185</b> | <b>33.03</b>       | <b>0.245</b> |
| std          | 1.500        | 6.588        | 0.305        | 2.990        | 0.432        | 1.607        | 1.101        | 7.70               | 0.083        |
|              |              |              |              |              |              |              |              | $\alpha$ from NLOM |              |
| 6a           | 0.174        | 3.407        | 0.628        | 3.439        | 0.001        | 3.498        | 0.522        | 51.10              | 0.300        |

Supplemental Table 1. Best-fit parameters for a 4-fiber family model determined using the simplex method for passive Wild-type (WT), Heterozygous (HET), and Knockout (KO) mouse types for each mouse tested (n=22). Fiber angle  $\alpha_o$  was allowed to be free in all parameter estimations except where noted (2a, 5a, and 6a).
